# Supplementary material for: Synthetic studies towards congeners of phomactin A. Re-examination of the structure of Sch 49028Electronic supplementary information (ESI) available: NMR data for 8 and 9. See http://www.rsc.org/suppdata/cc/b3/b310753a/
Source: Royal Society of Chemistry journal article supplement (doi:10.1039/b310753a), 2003-01-01
Supplement: b310753a.doc [file b310753a.doc]

NMR data for the ***epoxy cyclic hemiacetal* 8**in CDCl3: H (360 MHz) 4.94 (1H, d, *J* 11.8, C=C*H*), 4.64-4.60 (1H, m, C*H*OH), 4.49 (1H, dd, *J* 12.7 and 1.9, C=CC*H*HO), 4.03 (1H, dd, *J* 12.7 and 3.2, C=CCH*H*O), 3.74-3.69 (1H, m, O*H*), 4.06-4.01 (1H, m, O*H*), 2.83 (1H, s, C*H*(O)C), 2.43-1.63 (11H, m, 5 x C*H*2 and C*H*), 1.79 (3H, s, C=CC*H*3), 1.55 (3H, s, CH(O)CC*H*3), 0.92 (3H, s, CCH3) 0.91 (3H, d, *J* 7.6, CHC*H*3); C (90 MHz) 147.6 (s), 134.5 (s), 132.8 (s), 125.1 (d), 108.1 (s), 69.9 (t), 66.8 (t), 66.4 (d), 66.0 (d), 38.5 (t), 38.2 (s), 37.5 (t), 34.7 (t), 32.7 (t), 31.4 (d), 25.1 (t), 21.8 (q), 18.1 (q), 15.9 (q), 14.6 (q); NMR data for **8** in CD3OD: H (360 MHz) 5.08-5.05 (1H, obs m, C=C*H*), 4.69-4.64 (1H, m, C*H*OH), 4.47 (1H, dd, *J* 12.7 and 2.0, C=CC*H*HO), 4.09 (1H, dd, *J* 12.7 and 3.3, C=CCH*H*O), 2.84 (1H, s, C*H*(O)C), 2.50-2.39 (2H, m, C=CHC*H*2), 2.34-1.58 (9H, m, 4 x C*H*2 and C*H*), 1.77 (3H, s, C=CC*H*3), 1.54 (3H, s, CH(O)CC*H*3), 1.03 (3H, s, CC*H*3), 0.95 (3H, d, *J* 6.9, CHC*H*3); C (90 MHz) 146.9 (s), 133.9 (s), 133.6 (s), 124.9 (d), 108.5 (s), 69.0 (t), 65.9 (d), 65.8 (d), 64.4 (s), 37.8 (t), 37.7 (s), 37.5 (t), 34.1 (t), 32.0 (t), 31.2 (d), 24.5 (t), 20.7 (q), 17.0 (q), 14.6 (q), 13.3 (q).

NMR data for the ***epoxy cyclic hemiacetal* 9**in CDCl3: H (360 MHz) 5.06 (1H, d, *J* 11.5, C=C*H*), 4.49 (1H, br. s, C*H*OH), 4.45 (1H, d, *J* 12.7, OC*H*HC=C), 4.04 (1H, d, *J* 12.7, OCH*H*C=C), 3.36 (1H, s, CH2C-C*H*), 2.50 (1H, dq, *J* 5.8 and 5.5, CH3C*H*), 2.41 (1H, dd, *J* 14.5 and 10.8, C*H*HC=CH), 2.33 (1H, dt, *J* 13.7 and 3.5, C=CHC*H*H), 2.09-1.93 (3H, m, C=CHCH*H*, C*H*HC‑CH and CH*H*C=CH), 1.73-1.65 (4H, m, CHC*H*2 and C(4°)‑C*H*2), 1.69 (3H, s, C*H*3C=CH), 1.54 (3H, s, C*H*3C-CH), 1.21 (1H, dt, *J* 12.8 and 5.0, CH*H*C‑CH), 0.91 (3H, d, *J* 7.2, C*H*3CH), 0.88 (3H, s, C*H*3‑C(4°)); C (90 MHz) 149.5 (*C*=CC(OH)OCH2), 133.7 (C=*C*C(OH)OCH2), 133.0 (*C*=CH), 125.9 (C=*C*H), 107.7 (*C*(OH)OCH2), 69.7 (O*C*H2C=C), 67.2 (CH2C-*C*H), 66.6 (CH2*C*‑CH), 60.9 (*C*HOH), 38.4 (*C*H2C-CH), 38.0 (CH*C*H2), 37.9 (*C*(4°)-C=C), 34.6 (*C*H2C=CH), 32.6 (C(4°)‑*C*H2), 26.8 (CH3*C*H), 25.0 (C=CH*C*H2), 20.4 (*C*H3-C(4°)), 17.9 (*C*H3C-CH), 15.5 (*C*H3C=CH), 14.5 (*C*H3CH); NMR data for **9** in CD3OD: H (360 MHz) 5.18 (1H, d, *J* 11.9, C=C*H*), 4.42 (1H, dd, *J* 12.6 and 1.6, OC*H*HC=C), 4.37 (1H, br. s, C*H*OH), 4.10 (1H, d, *J* 12.6, OCH*H*C=C), 3.35 (1H, s, CH2C-C*H*), 2.63-2.54 (1H, m, CH3C*H*), 2.52 (1H, dd, *J* 10.0 and 2.6, C*H*HC=CH), 2.41 (1H, ddt, *J* 13.4, 11.8 and 4.0, C=CHC*H*H), 2.06 (1H, br. s, C=CHCH*H*), 2.00-1.93 (2H, m, CH*H*C=CH and C*H*HC‑CH), 1.74 (3H, s, C*H*3C=CH), 1.68-1.62 (4H, m, CHC*H*2 and C(4°)‑C*H*2), 1.53 (3H, s, C*H*3C‑CH), 1.19 (1H, dt, *J* 12.6 and 5.0, CH*H*C‑CH), 0.94 (3H, d, *J* 7.1, C*H*3CH), 0.92 (3H, s, C*H*3‑C(4°)); C (90 MHz) 149.7 (*C*=CC(OH)OCH2), 135.6 (C=*C*C(OH)OCH2), 134.8 (*C*=CH), 127.1 (C=*C*H), 109.8 (*C*(OH)OCH2), 70.4 (O*C*H2C=C), 68.0 (CH2C-*C*H), 65.7 (CH2*C*‑CH), 61.4 (*C*HOH), 39.5 (*C*H2C-CH), 39.1 (CH*C*H2), 39.0 (*C*(4°)-C=C), 35.5 (*C*H2C=CH), 33.5 (C(4°)‑*C*H2), 28.0 (CH3*C*H), 26.0 (C=CH*C*H2), 20.8 (*C*H3-C(4°)), 18.3 (*C*H3C-CH), 15.7 (*C*H3C=CH), 14.9 (*C*H3CH).
